# Supplementary material for: β-Galactosylceramidase Deficiency Causes Upregulation of Long Pentraxin-3 in the Central Nervous System of Krabbe Patients and Twitcher Mice
Source: MDPI journal article supplement (doi:10.3390/ijms23169436), 2022-08-21
Supplement: s1 [file s1]

## Supplementary Materials

**Table S1. Krabbe patients**

| Deidentified case ID | Age of Onset | Asymptomatic | Krabbe disease Classification | Transplanted | Age of transplant | Initial symptoms after transplant if asymptomatic | Age of death              | Stage                   |
|----------------------|--------------|--------------|-------------------------------|--------------|-------------------|---------------------------------------------------|---------------------------|-------------------------|
| CW15-103             | N/A          | Yes          | Early Infantile               | Yes          | 1 month 6 days    | 6 months 17 days                                  | 15 years 5 months 30 days | N/A                     |
| CW16-061             | 5 months     | No           | Early Infantile               | No           | N/A               | N/A                                               | 6 years 9 months 12 days  | IV at 19 months         |
| CW16-064             | 3.5 months   | No           | Early Infantile               | No           | N/A               | N/A                                               | 1 year 6 months           | II-III at 5 months      |
| CW17-060             | 4 months     | No           | Early Infantile               | No           | N/A               | N/A                                               | 1 year 2 months 13 days   | IV at 10 months         |
| CW18-060             | 5 months     | No           | Early Infantile               | No           | N/A               | N/A                                               | 3 years 1 month 8 days    | ND                      |
| CW18-064             | 8 months     | No           | Late Infantile                | No           | N/A               | N/A                                               | 12 years 5 months         | II at 3 years 10 months |
| CW16-062             | 12 months    | No           | Late Infantile                | No           | N/A               | N/A                                               | 9 years 8 months 20 days  | IV at 5 years 7 months  |
| CW16-065             | 8 months     | No           | Late Infantile                | No           | N/A               | N/A                                               | 2 years 4 months 18 days  | IV at 20 months         |
| CW16-066             | 9 months     | No           | Late Infantile                | No           | N/A               | N/A                                               | 2 years 2 months 9 days   | IV at 22 months         |

N/A= Not applicable, ND= No Data

Stage II- increased tone irritability, difficulty eating; Stage III- hypotonia, unable to eat; Stage IV- blind, deafness and quadriplegia, dysautonomia.

**Table S2. qPCR oligonucleotide primers**

| <b>Gene</b>       | <b>Forward</b>           | <b>Reverse</b>           |
|-------------------|--------------------------|--------------------------|
| <i>Ptx3</i>       | 5'-GACCTCGGATGACTACGAG   | 5'-CTCCGAGTGCTCCTGGCG    |
| <i>Ptx3+hPtx3</i> | 5'-TTTGTGCTCTCTGGTCTGC   | 5'-CGAGTTCTCCAGCATGATGAA |
| <i>Mbp</i>        | 5'-GCTTCTTTAGCGGTGACAGG  | 5'-CTTGGGATGGAGGTGGTGT   |
| <i>Cepbd</i>      | 5'-TCGACTTCAGCGCCTACATT  | 5'-CTAGCGACAGACCCACAC    |
| <i>Tnfa</i>       | 5'-GCCTCTTCTCATTCTGCTT   | 5'-TGATCTGAGTGTGAGGGTCTG |
| <i>Cxcl1</i>      | 5'-GCTGGGATTACCTCAAGAA   | 5'-TGGGGACACCTTTTAGCATC  |
| <i>IL1a</i>       | 5'-CAGTTCTGCCATTGACCATC  | 5'-GAATCTTCCCGTTGCTTGAC  |
| <i>Gfap</i>       | 5'-AGAAAACCGCATCACCATT   | 5'-CGTCCTTGTGCTCCTGCT    |
| <i>Iba1</i>       | 5'-CGAATGCTGGAGAACTTGG   | 5'-ACCAGTTGGCCTCTTGTGTT  |
| <i>CD16/32</i>    | 5'-CTGGGAGTGATTTCTGACTGG | 5'-TGGTTGGCTTTTGGGATAGA  |
| <i>Arg1</i>       | 5'-GCAGAGGTCCAGAAGAATGG  | 5'-TTGTCAGGGGAGTGTTGATG  |
| <i>CD206</i>      | 5'-TGGCGAGCATCAAGAGTAAA  | 5'-CATAGGAAACGGGAGAACCA  |
| <i>Gapdh</i>      | 5'-GAAGGTCGGTGTGAACGGATT | 5'-TGACTGTGCCGTTGAATTTG  |

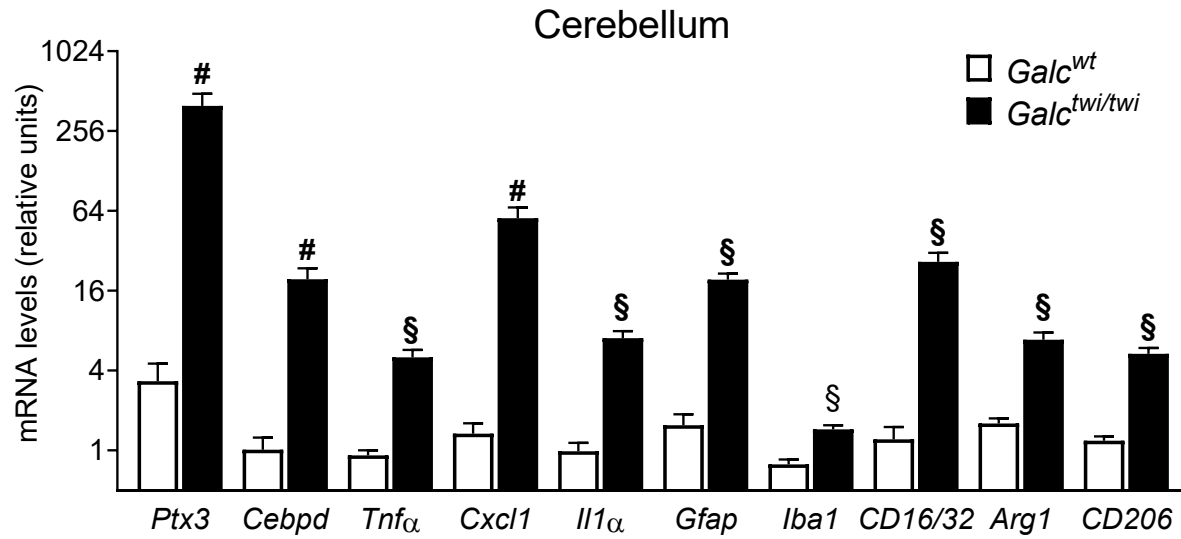

**Figure S1. *Ptx3* and proinflammatory gene expression in the cerebellum of *twitcher* mice.** Steady state mRNA levels of the indicated genes were evaluated by qPCR in the cerebellum of *Galc*<sup>wt</sup> and *Galc*<sup>twi/twi</sup> mice harvested at P35. Data were normalized to *Gapdh* expression and are the mean  $\pm$  SEM of 7-10 animals per group, #,  $P < 0.01$ ; §,  $P < 0.001$ , *Galc*<sup>wt</sup> versus *Galc*<sup>twi/twi</sup>, Student's t-test.

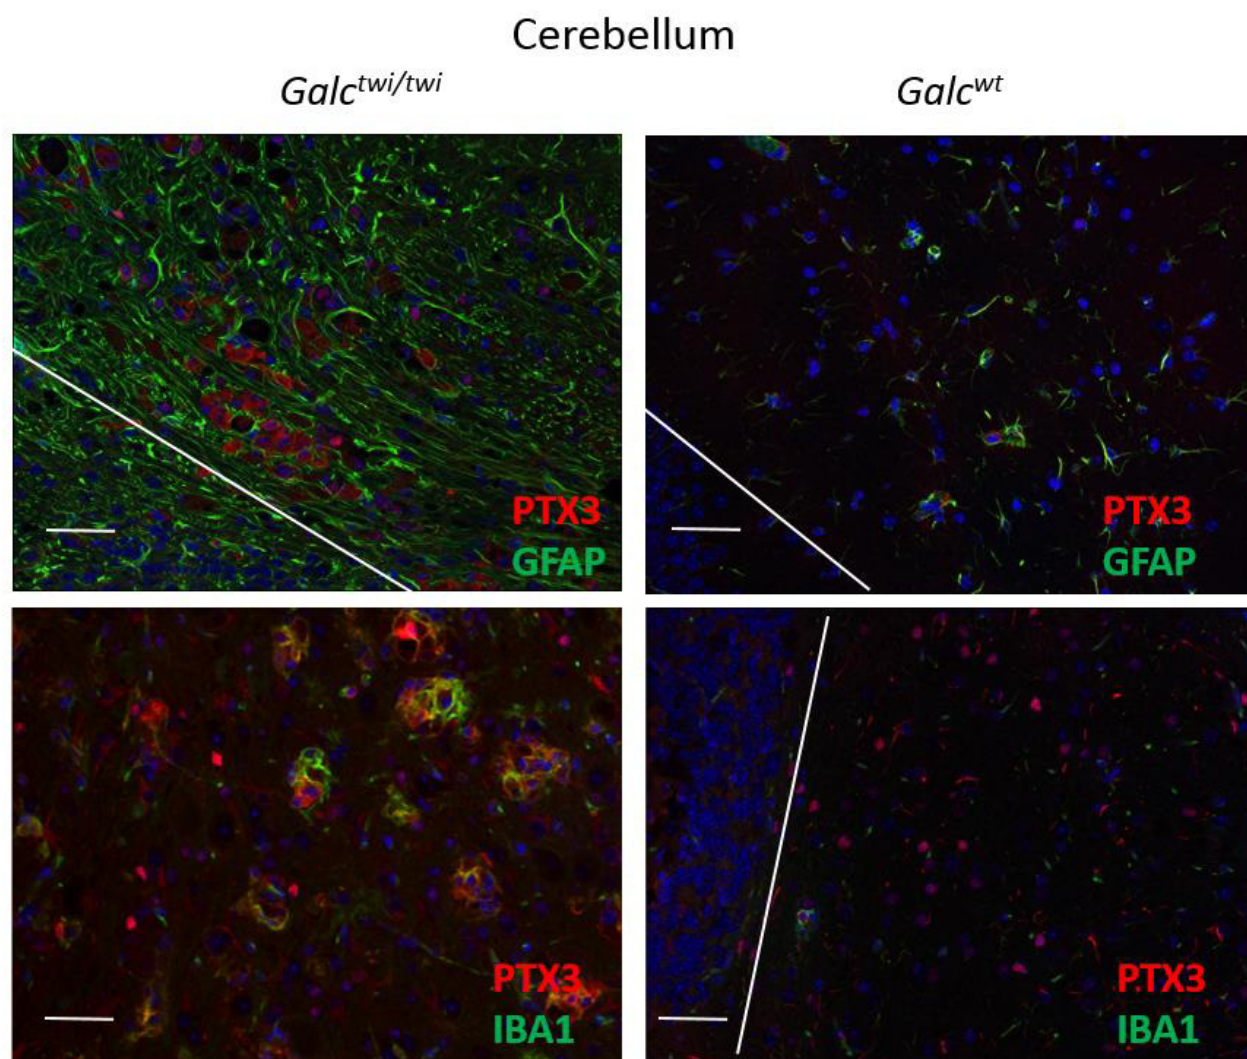

**Figure S2. PTX3 immunolocalization in the cerebellum of *Galc<sup>twi/twi</sup>* and *Galc<sup>wt</sup>* mice.** Paraffin-embedded sections of cerebellum of *Galc<sup>twi/twi</sup>* and *Galc<sup>wt</sup>* mice were double-immunostained at P35 with anti-PTX3/GFAP or anti-PTX3/IBA1 antibodies. The white line indicates the boundary between white and gray matter. Scale bar, 50  $\mu$ m.

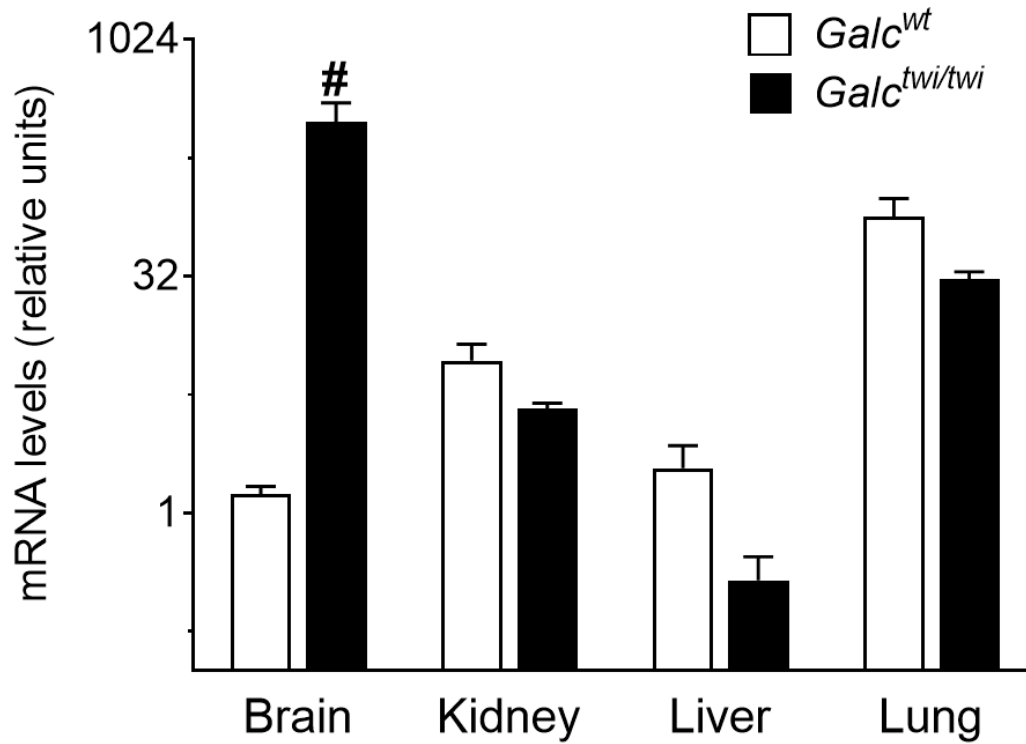

**Figure S3. *Ptx3* expression in the peripheral organs of *twitcher* mice.** *Ptx3* expression was evaluated by qPCR in the brain, kidney, liver, and lungs of *Galc*<sup>wt</sup> and *Galc*<sup>twi/twi</sup> mice at P35. Data are the mean  $\pm$  S.E.M. of 3-6 animals per group. #,  $P < 0.01$ , *Galc*<sup>wt</sup> versus *Galc*<sup>twi/twi</sup>, Student's t-test.

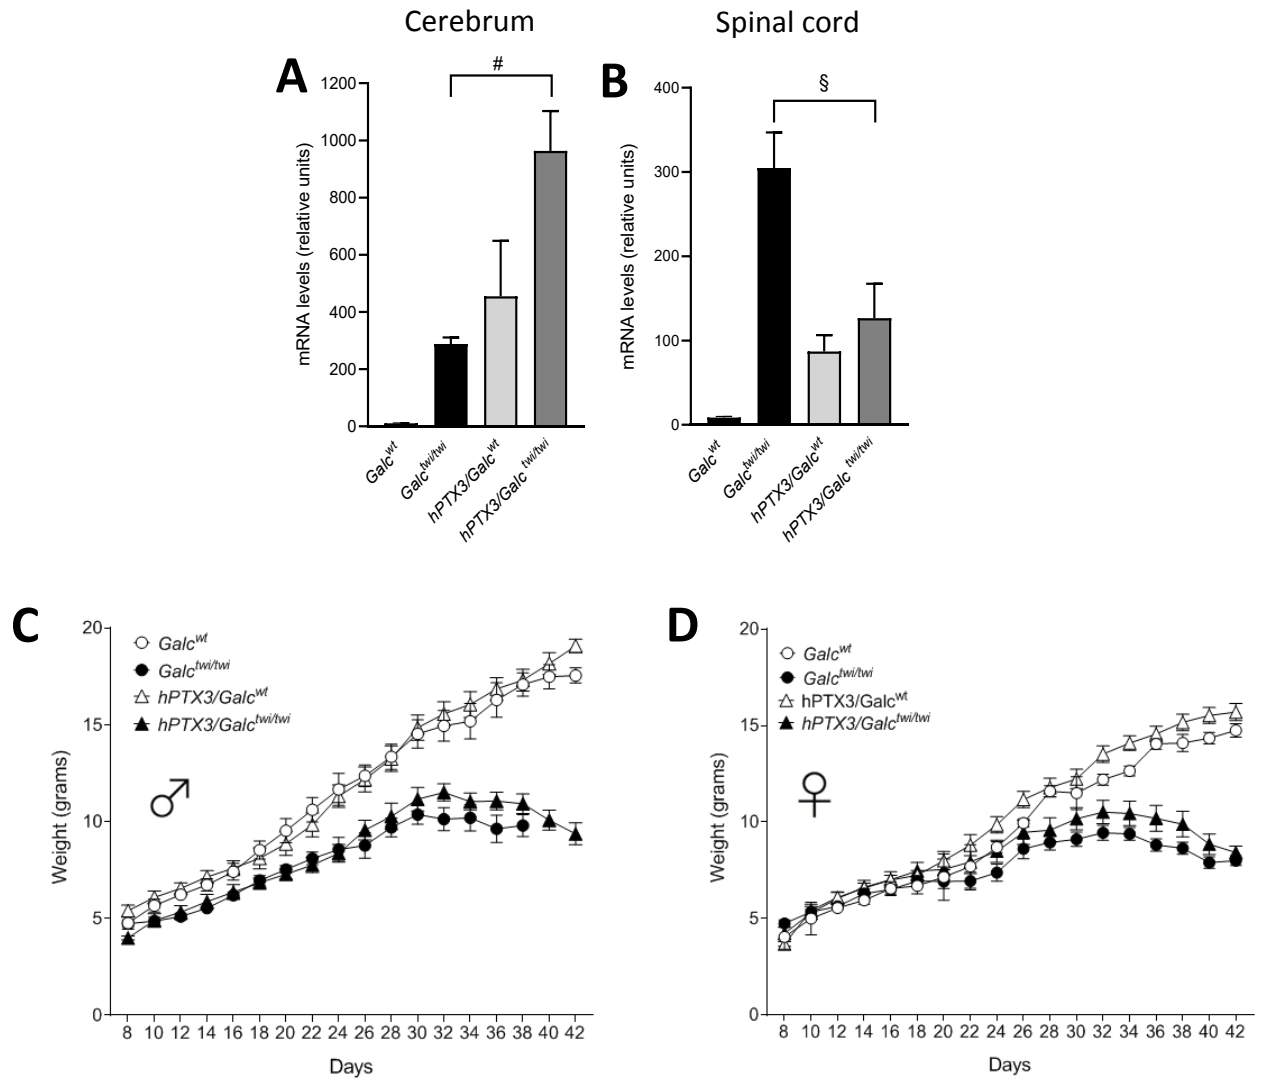

**Figure S4. Characterization of *hPTX3/Galc<sup>twi/twi</sup>* mice.** **A, B** qPCR analysis of murine *plus* human PTX3 expression in cerebrum (**A**) and spinal cord (**B**) of *hPTX3/Galc<sup>twi/twi</sup>* mice compared to *Galc<sup>wt</sup>*, *Galc<sup>twi/twi</sup>* and *hPTX3/Galc<sup>wt</sup>* animals. The analysis was performed at P35 using oligonucleotide primers designed to recognize simultaneously both human and murine PTX3 transcripts. Data are the mean  $\pm$  SEM. of 3-4 animals per group. #,  $P < 0.01$ ; §,  $P < 0.05$ , Student's t-test. **C, D** The body weight gain of male (**C**) and female (**D**) *hPTX3* overexpressing *hPTX3/Galc<sup>wt</sup>* and *hPTX3/Galc<sup>twi/twi</sup>* mice was compared to that of the corresponding control *Galc<sup>wt</sup>* and *Galc<sup>twi/twi</sup>* animals. Data are the mean  $\pm$  SEM. of 2-12 animals per group.

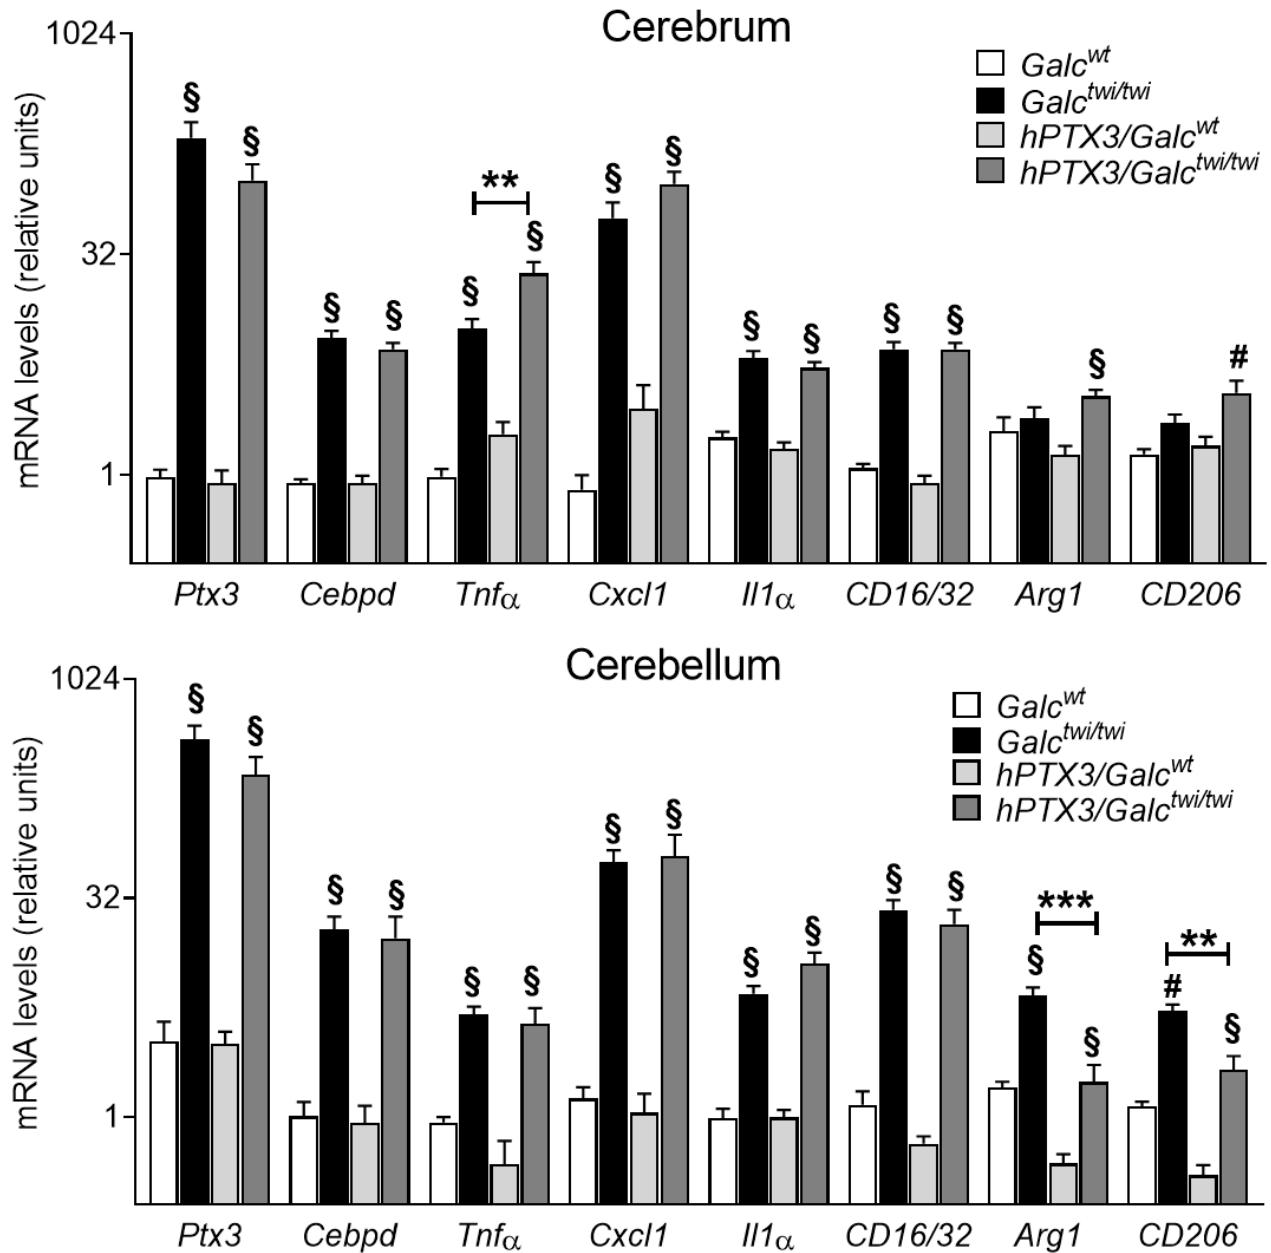

**Figure S5. qPCR analysis of the cerebrum and cerebellum of *hPTX3/Galc*<sup>wt</sup> and *hPTX3/Galc*<sup>twi/twi</sup> mice.** Steady state mRNA levels of the indicated genes were evaluated by qPCR in the cerebrum and cerebellum of *hPTX3/Galc*<sup>wt</sup> and *hPTX3/Galc*<sup>twi/twi</sup> mice and compared to those measured in the corresponding control *Galc*<sup>wt</sup> and *Galc*<sup>twi/twi</sup> mice harvested at P35. Data were normalized to *Gapdh* expression and are the mean  $\pm$  SEM. of 7-10 animals per group. \*\*,  $P < 0.01$ ; \*\*\*,  $P < 0.001$ , for *Galc*<sup>twi/twi</sup> versus *hPTX3/Galc*<sup>twi/twi</sup>; #,  $P < 0.01$ ; §,  $P < 0.001$  for *Galc*<sup>wt</sup> versus *Galc*<sup>twi/twi</sup> or *hPTX3/Galc*<sup>wt</sup> versus *hPTX3/Galc*<sup>twi/twi</sup>. One-way ANOVA with post-hoc comparisons with adjustment for multiple comparisons (Sidak).

Figure 3B

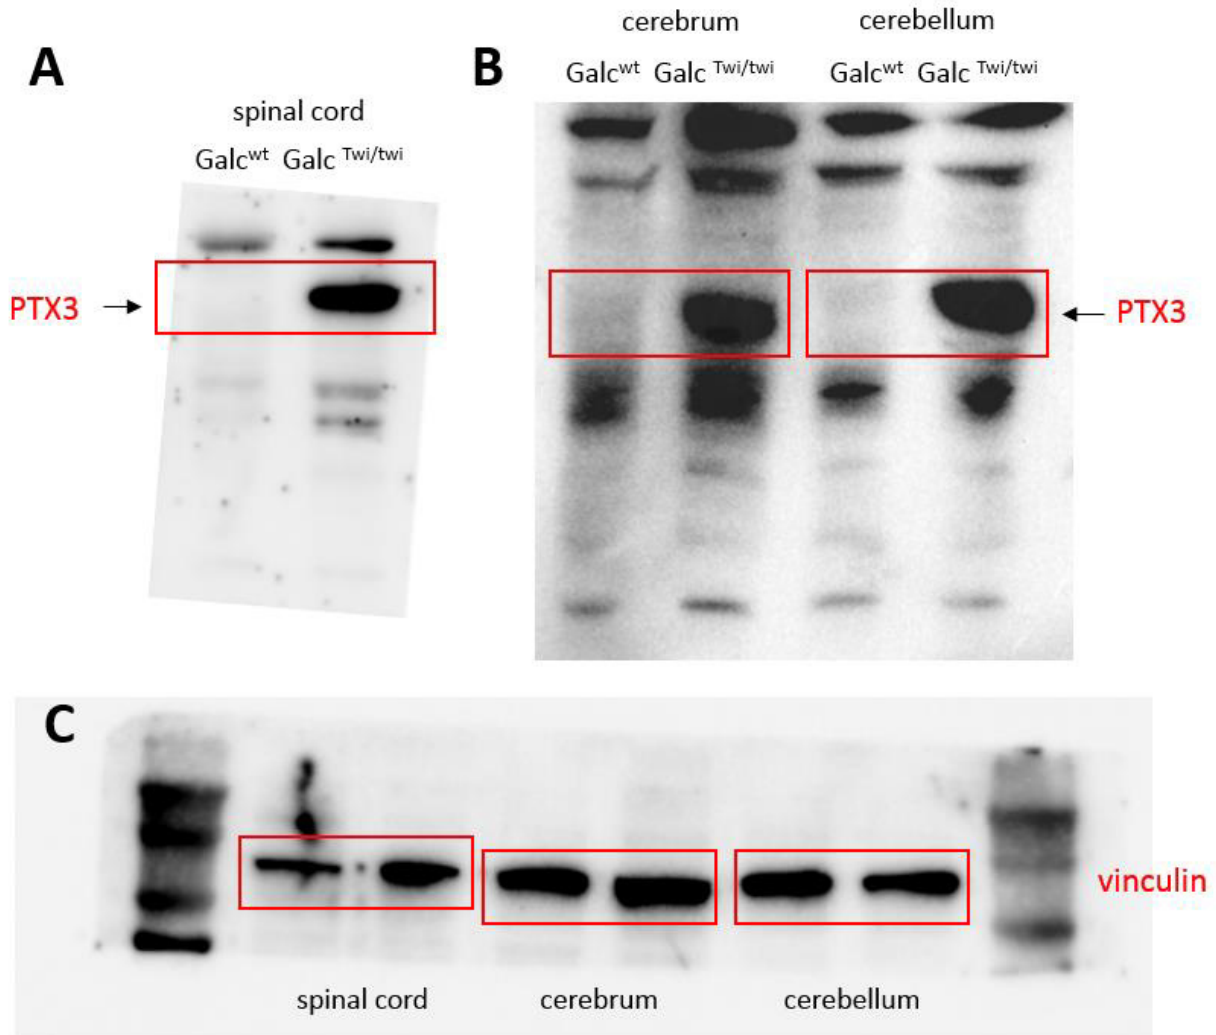

**Addendum to Figure 3B.** Spinal cord (A), cerebrum and cerebellum (B) extracts were run on separate gels and decorated with anti-PTX3 antibody. The same extracts were run also on a separate gel that was decorated with an anti-vinculin antibody (C).
